# Supplementary material for: Weak acid triggers the ring opening of an otherwise long-lived triangle terthiazole closed isomer
Source: Royal Society of Chemistry journal article supplement (doi:10.1039/b822878g), 2009-01-01

## Electronic Supplementary Information **revised version**

### Weak acid triggers the ring opening of an otherwise long-lived triangle terthiazole closed isomer

Christophe Coudret, Tetsuya Nakagawa, Tsuyoshi Kawai, Jean-Claude Micheau

| pages | schedule                                                                                                                                                |
|-------|---------------------------------------------------------------------------------------------------------------------------------------------------------|
| S2:   | I - NMR Titration of the open form by TFA in CD <sub>3</sub> CN                                                                                         |
| S3:   | II - Assignment of the aromatic protons of open form in the presence of TFA in CD <sub>3</sub> CN (2D-COSY <sup>1</sup> H)                              |
| S4:   | III - <sup>1</sup> H - <sup>19</sup> F HOESY (400 MHz, mixing time 0.5s) of open form in the presence of an excess of TFA (>60eq) in CD <sub>3</sub> CN |
| S5:   | IV - Bleaching kinetics of the closed isomer C in the presence of TFA via Initial Slope v <sub>0</sub> analysis                                         |
| S6:   | V - Association constant from NMR titration of the open isomer by TFA in acetonitrile.                                                                  |
| S8:   | VI - DFT calculated energies in gas and acetonitrile phases                                                                                             |
| S9 :  | VII - Bond lengths variation (in angstrom) by DFT Calculations                                                                                          |
| S10:  | VIII - TD-DFT calculation of the UV-visible spectrum of the CH <sup>+</sup> species in liquid phase, no counter anion.                                  |

### I- NMR Titration of the Open form by TFA in CD<sub>3</sub>CN

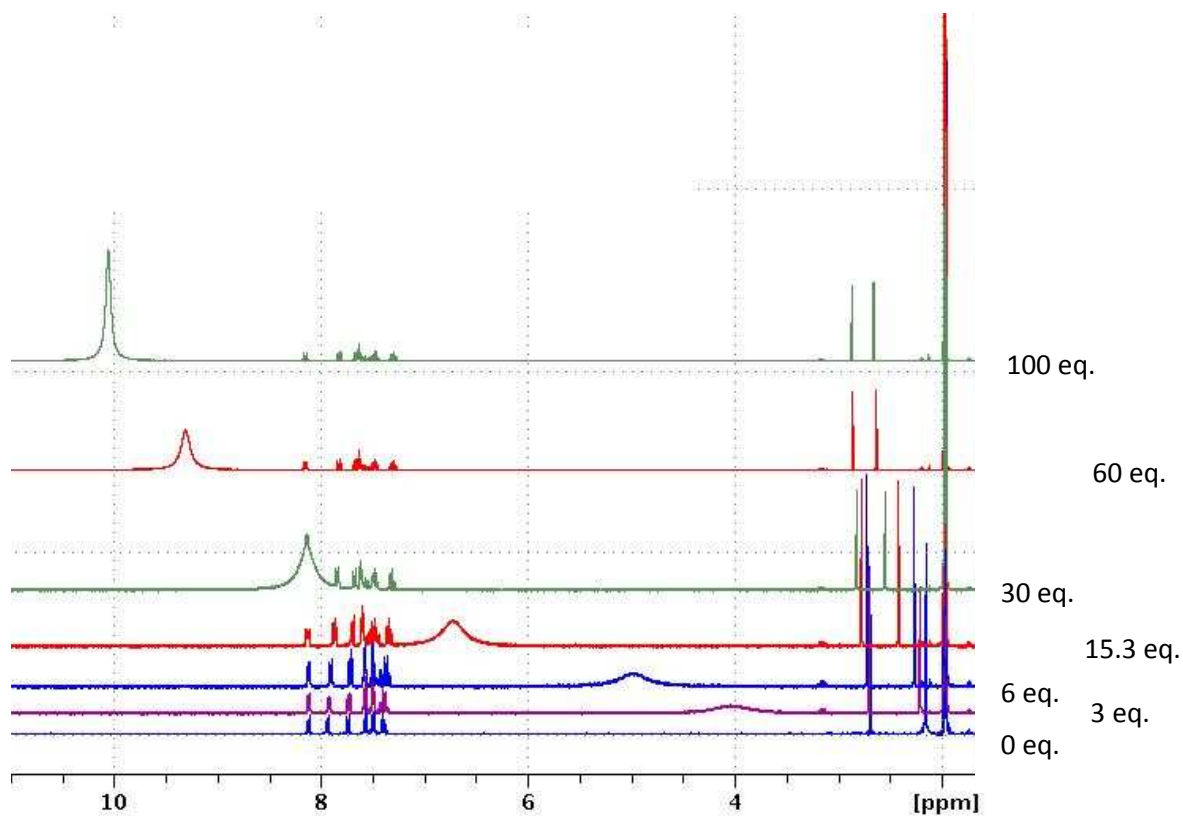

**Fig S1** : NMR titration of Open triangle terthiazole by TFA ; [O]  $\approx 3.10^{-3}$ M; [TFA] from  $9e-3$  to 0.3M

## II- Assignment of the aromatic protons of Open form in the presence of TFA in CD<sub>3</sub>CN (2D-COSY <sup>1</sup>H)

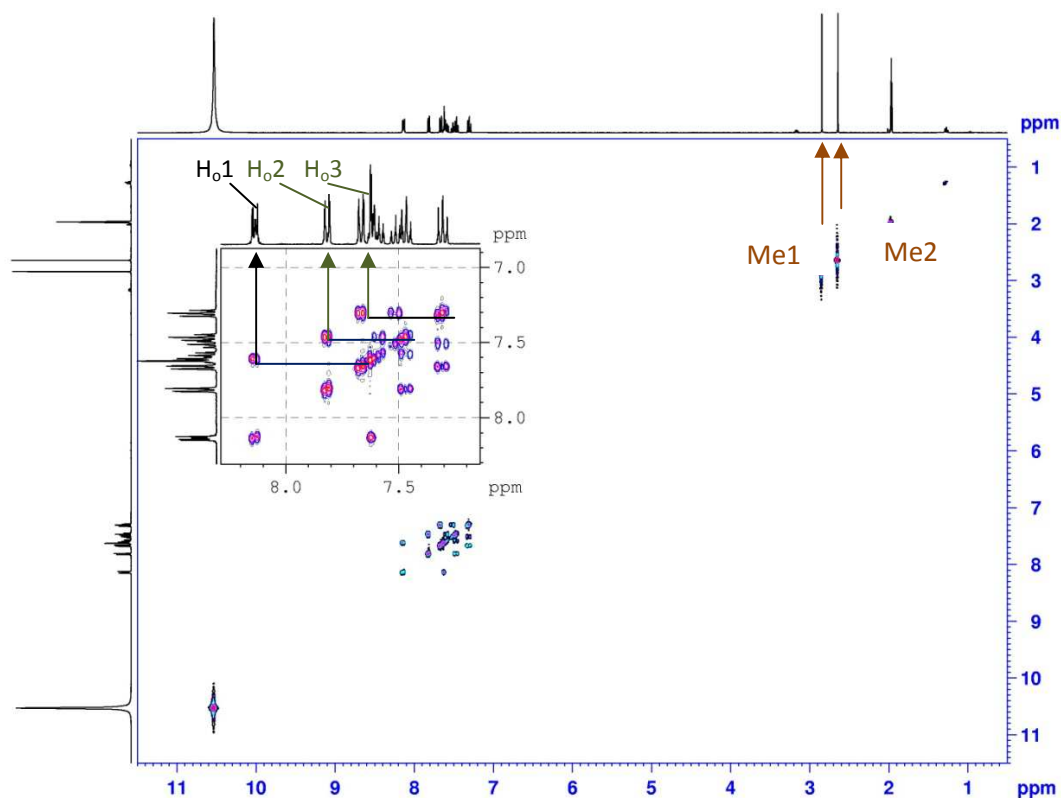

**Fig S2:** Open form 2D-COSY spectrum, Excess TFA (> 60 eq) in CD<sub>3</sub>CN offset: expansion of the aromatic zone showing the correlation of the *ortho* phenyl hydrogen H<sub>o</sub>1,2,3 to other signals. H<sub>o</sub>1 is correlated to only one signal (3H) while H<sub>o</sub>2 and 3 are correlated to two signals (integration resp. 2 and 1).

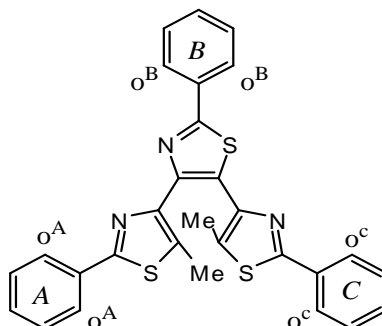

**Scheme S3:** 2D-COSY proton assignment : at this stage, no ambiguous assignment can be made to identify H<sub>o</sub>1,2,3 and H<sub>o</sub><sup>A,B,C</sup> as well as for Me1 and Me2

III-  $^1\text{H}$  -  $^{19}\text{F}$  HOESY (400 MHz, mixing time 0.5s) of Open form in the presence of an excess of TFA (>60eq)

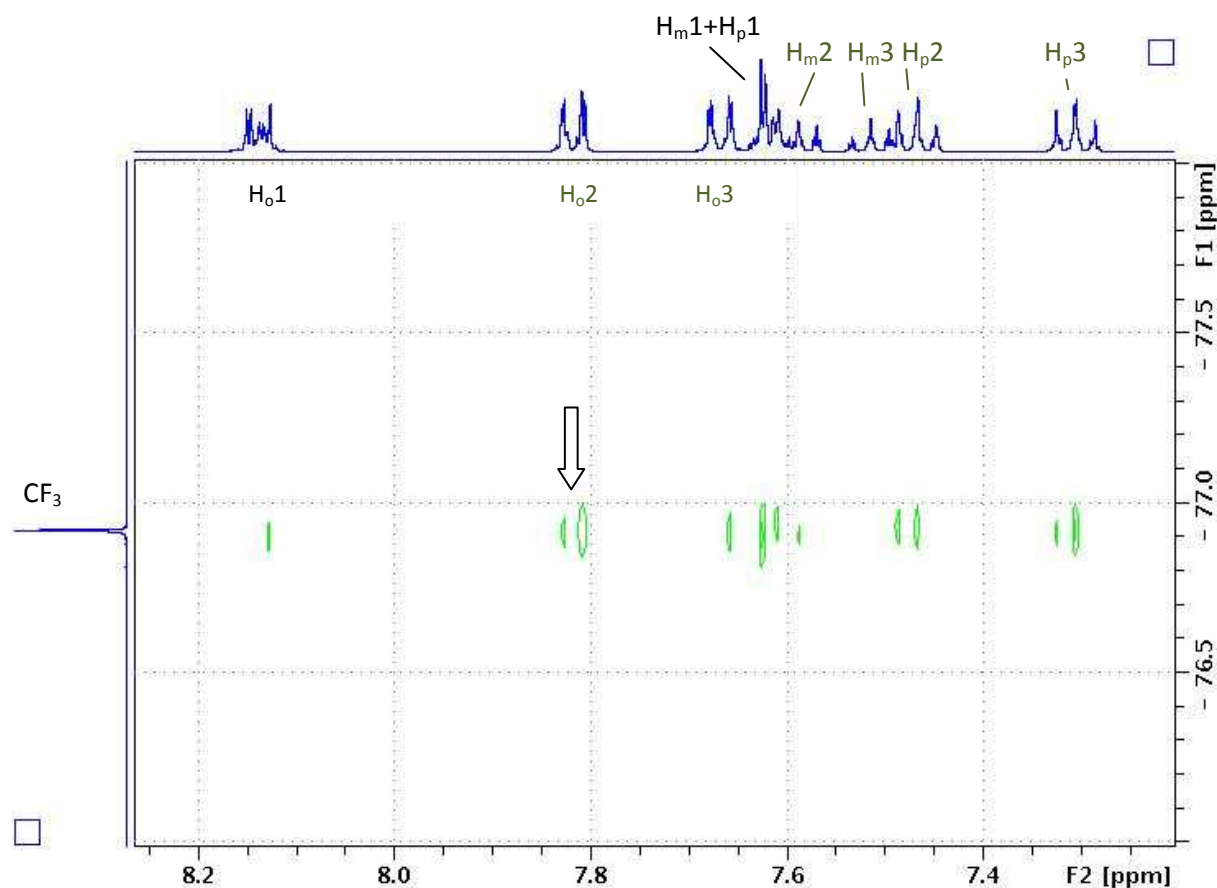

**Fig S4:** H-F HOESY Spectrum (0.5s) (Aromatic hydrogen labeling

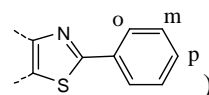

From the slightly higher intensity of the H<sub>02</sub> correlation spot, a putative assignment can be given as : ring I ≈ ring C, ring II ≈ ring A and ring III ≈ ring B. Methyl groups would then be Me1 ≈ Me(C), and Me2 ≈ Me(A).

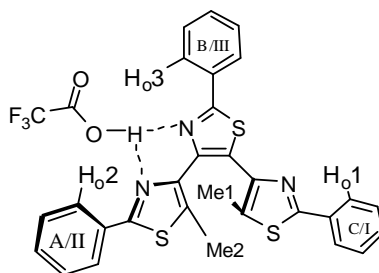

#### IV- Bleaching kinetics of the closed isomer C in the presence of TFA via Initial Slope $v_0$ analysis

The kinetic scheme is the following:

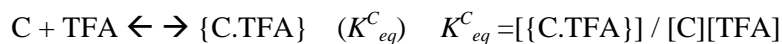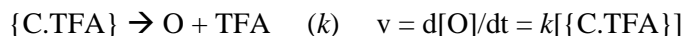

with  $K_{eq}^C$  the association constant of the closed terthiazole C with TFA and  $k$  the rate constant of the opening process.

At the very beginning of the reaction, one can neglect the isomerization reaction so  $[C] \approx ([C]_0 - [C.TFA])$ . Keeping in mind that when  $[TFA] \rightarrow \infty$ ;  $v \rightarrow V_{max} = k[C]_0$  and taking in account that the trifluoroacetic acid is always in large excess so that  $[TFA] \approx [TFA]_0$ , then:

$$V_0 = V_{max} \frac{K_{eq}^C [TFA]}{K_{eq}^C [TFA] + 1} = V_{max} \frac{K_{eq}^C Eq [C]_0}{K_{eq}^C Eq [C]_0 + 1},$$

with  $Eq = [TFA]_0 / [C]_0$  number of equivalent of acid added to the solution.

In double reciprocal, it becomes:

$$1/v = (1/V_{max}) (1 / (K_{eq}^C Eq [C]_0) + 1)$$

Thus a plot of  $1/v_0$  vs.  $1/Eq$  must give a straight line with  $slope = (1 / (V_{max} K_{eq}^C [C]_0))$  and  $intercept = 1/V_{max}$ , from which one can extract the association constant  $K_{eq}^C = (intercept/slope)/[C]_0$  and the rate constant  $k = 1/(intercept)[C]_0$ .

### V- Association constant from NMR titration of the open isomer by TFA in ACN (acetonitrile).

An average chemical shift  $\delta$  deriving from  $\delta_O$ ,  $\delta_{\{O.TFA\}}$  and  $\alpha$ , respectively the chemical shift of the free open dye O, the chemical shift and the fraction of complexed open dye {O.TFA} is introduced for each signal:

$$\delta = \alpha\delta_{\{O.TFA\}} + (1 - \alpha)\delta_O = \alpha(\delta_{\{O.TFA\}} - \delta_O) + \delta_O, \text{ so } 1/\alpha = (\delta_{\{O.TFA\}} - \delta_O) / (\delta - \delta_O)$$

Taking in account that the trifluoroacetic acid is always in large excess, the association constant can be rewritten as

$$[\{O.TFA\}]/([O]_0 - [\{O.TFA\}]) = K_{eq}^O [TFA]_0 = \alpha/(1 - \alpha), \text{ or } 1/\alpha = 1 + 1/K_{eq}^O [TFA]_0$$

Thus in a double reciprocal plot of  $1/(\delta - \delta_O)$  v.s.  $1/[TFA]_0$ , one should obtain a straight line with (*slope*) =  $1/(K_{eq}^O (\delta_{\{O.TFA\}} - \delta_O))$  and (*intercept*),  $1/(\delta_{\{O.TFA\}} - \delta_O)$  since

$$(\delta_{\{O.TFA\}} - \delta_O) / (\delta - \delta_O) = 1 + 1/K_{eq}^O [TFA]_0,$$

the association constant  $K_{eq}^O$  being given by the ratio (*intercept*)/(*slope*). Four signals are easily followed during the titration and were considered for the association constant determination : H<sub>0</sub>2, H<sub>0</sub>3, Me1 and Me2.

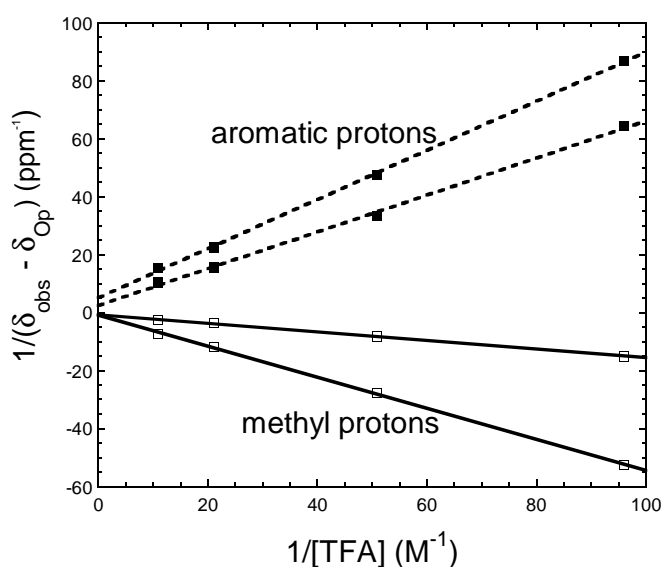

**Figure S5:** Linearization of the data according to the previous formula giving rise to  $K_{eq}^O$  estimation.  $[O] \approx 3 \cdot 10^{-3} M$ ;  $[TFA]$  from  $1e-2$  to  $0.1 M$ . From top to bottom : “aromatic protons” : H<sub>0</sub>2 & H<sub>0</sub>3 and “methyl protons”: Me1 and Me2.

| Proton           | Intercept | slope  | $K_{eq}^O$ ( $M^{-1}$ ) |
|------------------|-----------|--------|-------------------------|
| Me1              | -0.885    | -0.537 | 1.65                    |
| Me2              | -0.689    | -0.150 | 4.6                     |
| H <sub>o</sub> 2 | 2.48      | 0.639  | 3.9                     |
| H <sub>o</sub> 3 | 5.26      | 0.847  | 6.2                     |

**Table S1** : Analysis of the linearization for the 4 selected signals

An average value of  $K_{eq}^O \approx 4 \pm 2 M^{-1}$  was adopted.

**VI-DFT calculated energies** in hartree for neutral and monoprotonated forms closed & open  
 (phenyl groups not mentioned for clarity)

Energies calculated *in vacuo* and corrected for the effect of acetonitrile (CH<sub>3</sub>CN), with a dielectric constant of 36.64, by using the polarizable continuum model (PCM) of solvation.

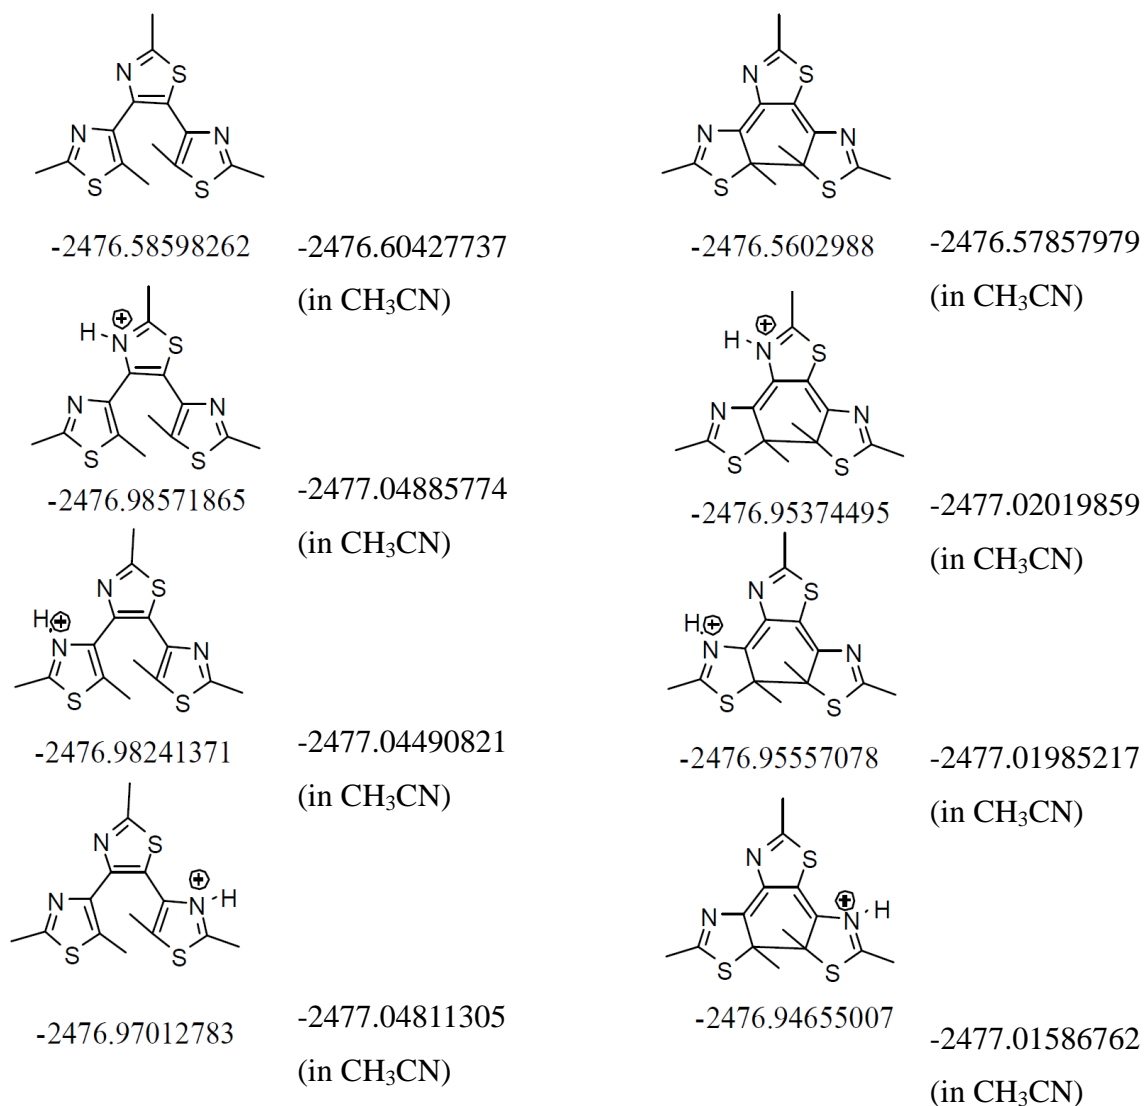



## VII- Bond lengths variation (in angstrom) by DFT Calculations

See text for computational details.

### A-Photoactive core (gas phase)

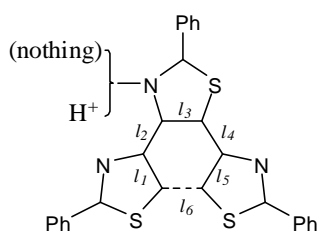

| Bond  | O       | C       | OH <sup>+</sup> | CH <sup>+</sup> | C-O      | CH <sup>+</sup> -OH <sup>+</sup> |
|-------|---------|---------|-----------------|-----------------|----------|----------------------------------|
| $l_1$ | 1.37679 | 1.5456  | 1.37854         | 1.53857         | 0.16881  | 0.16003                          |
| $l_2$ | 1.47989 | 1.37396 | 1.46427         | 1.36513         | -0.10593 | -0.09914                         |
| $l_3$ | 1.38226 | 1.46193 | 1.37546         | 1.44146         | 0.07967  | 0.066                            |
| $l_4$ | 1.46631 | 1.35954 | 1.45749         | 1.35934         | -0.10677 | -0.09815                         |
| $l_5$ | 1.37931 | 1.54443 | 1.3872          | 1.54957         | 0.16512  | 0.16237                          |
| $l_6$ | 3.69934 | 1.54549 | 3.72035         | 1.5521          | -2.15385 | -2.16825                         |

### B- Weak dependence of bond lengths with solvent

| medium        | $l_1$   | $l_2$   | $l_3$   | $l_4$   | $l_5$   | $l_6$   |
|---------------|---------|---------|---------|---------|---------|---------|
| C (gas phase) | 1.54560 | 1.37396 | 1.46193 | 1.35954 | 1.54443 | 1.54549 |
| C (PCM)       | 1.54516 | 1.37396 | 1.46177 | 1.35873 | 1.54240 | 1.54619 |

### C- Central “thiazole ring” of the closed compound

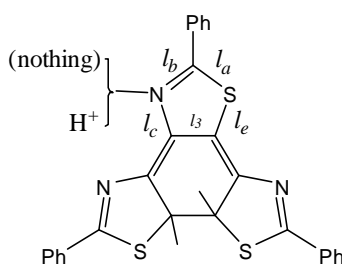

| Bond  | C       | CH <sup>+</sup> | CH <sup>+</sup> -C | (CH <sup>+</sup> -CH)/C (%) |
|-------|---------|-----------------|--------------------|-----------------------------|
| $l_a$ | 1.7454  | 1.81098         | 0.06558            | 1,0                         |
| $l_b$ | 1.339   | 1.29328         | -0.04572           | 3,5                         |
| $l_c$ | 1.39651 | 1.38244         | -0.01407           | -3,6                        |
| $l_3$ | 1.44146 | 1.46193         | 0.02047            | 1,1                         |
| $l_e$ | 1.77897 | 1.7594          | -0.01957           | -1,4                        |

**VIII- TD-DFT calculation** of the UV-visible spectrum for the  $\text{CH}^+$  species in liquid phase, no counter anion.

| Excited State | $\lambda$ [nm] (Oscillator Strength) | Assignment    |
|---------------|--------------------------------------|---------------|
| 1             | 723 (0.29)                           | HOMO > LUMO   |
| 2             | 506 (0.32)                           | HOMO > LUMO+1 |
| 3             | 398 (0.076)                          | HOMO-1 > LUMO |
| 4             | 382 (0.42)                           | HOMO > LUMO+2 |
| 5             | 373 (0.33)                           | HOMO-2 > LUMO |
| 6             | 365 (0.33)                           | HOMO-3 > LUMO |
| 7             | 358 (0.058)                          | HOMO-4 > LUMO |
| 8             | 355 (0.023)                          | HOMO-5 > LUMO |

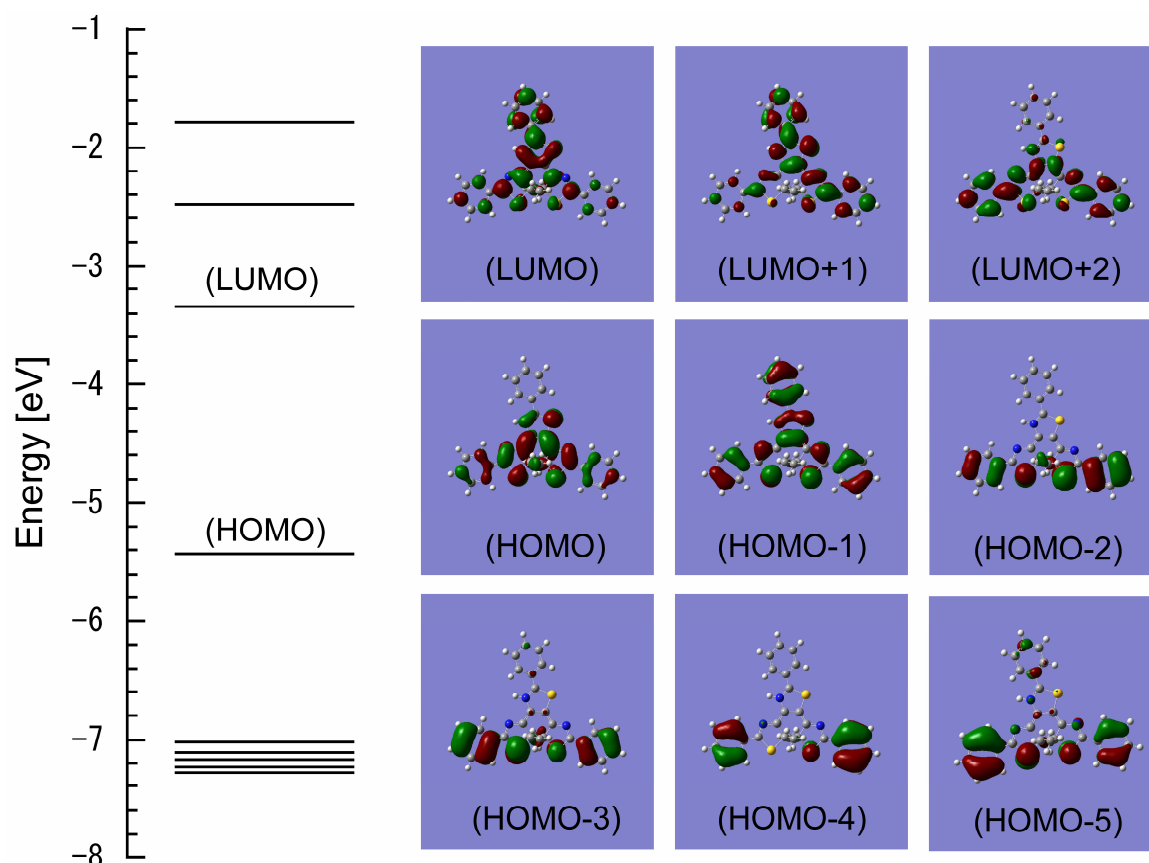

Supplement: b822878g.pdf [file b822878g.pdf]
